# Supplementary material for: Effect of Yogurt Addition on the Stability of Anthocyanin during Cold Storage of Strawberry, Raspberry, and Blueberry Smoothies
Source: MDPI journal article supplement (doi:10.3390/foods12203858), 2023-10-21
Supplement: s1 [file s1]

Table S1. Changes in pH during cold storage of smoothies.

| Type of smoothie    | Addition of yogurt | pH                        |                           |                           |                           |                          |
|---------------------|--------------------|---------------------------|---------------------------|---------------------------|---------------------------|--------------------------|
|                     |                    | Storage time [week]       |                           |                           |                           |                          |
|                     |                    | 0                         | 1                         | 2                         | 3                         | 4                        |
| Strawberry smoothie | 0%                 | 3.46 <sup>Ad</sup> ±0.02  | 3.46 <sup>Ad</sup> ±0.00  | 3.45 <sup>Ac</sup> ±0.01  | 3.46 <sup>Ac</sup> ±0.02  | 3.44 <sup>Ac</sup> ±0.01 |
|                     | 10%                | 3.50 <sup>Ac</sup> ±0.02  | 3.51 <sup>Ac</sup> ±0.04  | 3.51 <sup>Ab</sup> ±0.03  | 3.51 <sup>Ab</sup> ±0.02  | 3.50 <sup>Ab</sup> ±0.03 |
|                     | 20%                | 3.61 <sup>Ab</sup> ±0.02  | 3.58 <sup>ABb</sup> ±0.01 | 3.59 <sup>ABa</sup> ±0.01 | 3.57 <sup>Ba</sup> ±0.01  | 3.57 <sup>Ba</sup> ±0.00 |
|                     | 30%                | 3.67 <sup>Aa</sup> ±0.02  | 3.65 <sup>Aa</sup> ±0.03  | 3.63 <sup>ABa</sup> ±0.02 | 3.60 <sup>Ba</sup> ±0.02  | 3.60 <sup>Ba</sup> ±0.01 |
| Raspberry smoothie  | 0%                 | 3.35 <sup>Ac</sup> ±0.03  | 3.35 <sup>Ac</sup> ±0.01  | 3.34 <sup>Ab</sup> ±0.03  | 3.35 <sup>Ab</sup> ±0.03  | 3.34 <sup>Ab</sup> ±0.02 |
|                     | 10%                | 3.37 <sup>Abc</sup> ±0.02 | 3.37 <sup>Abc</sup> ±0.02 | 3.34 <sup>Bb</sup> ±0.01  | 3.33 <sup>Bb</sup> ±0.00  | 3.34 <sup>Bb</sup> ±0.01 |
|                     | 20%                | 3.41 <sup>Ab</sup> ±0.02  | 3.39 <sup>ABb</sup> ±0.03 | 3.36 <sup>Bb</sup> ±0.01  | 3.35 <sup>Bb</sup> ±0.01  | 3.35 <sup>Bb</sup> ±0.00 |
|                     | 30%                | 3.49 <sup>Aa</sup> ±0.01  | 3.45 <sup>BCa</sup> ±0.02 | 3.42 <sup>Ca</sup> ±0.04  | 3.41 <sup>Ca</sup> ±0.03  | 3.40 <sup>Ca</sup> ±0.03 |
| Blueberry smoothie  | 0%                 | 3.53 <sup>Ad</sup> ±0.02  | 3.54 <sup>Ac</sup> ±0.01  | 3.54 <sup>Ac</sup> ±0.01  | 3.53 <sup>Ac</sup> ±0.01  | 3.54 <sup>Ac</sup> ±0.01 |
|                     | 10%                | 3.61 <sup>Ac</sup> ±0.03  | 3.57 <sup>ABc</sup> ±0.03 | 3.54 <sup>BCc</sup> ±0.04 | 3.48 <sup>CDd</sup> ±0.03 | 3.42 <sup>Dd</sup> ±0.03 |
|                     | 20%                | 3.78 <sup>Ab</sup> ±0.04  | 3.72 <sup>Bb</sup> ±0.01  | 3.70 <sup>BCb</sup> ±0.03 | 3.62 <sup>CDb</sup> ±0.04 | 3.60 <sup>Db</sup> ±0.01 |
|                     | 30%                | 3.92 <sup>Aa</sup> ±0.03  | 3.88 <sup>ABa</sup> ±0.02 | 3.82 <sup>BCa</sup> ±0.04 | 3.78 <sup>CDa</sup> ±0.01 | 3.73 <sup>Da</sup> ±0.04 |

<sup>A-E</sup> – Same line followed by different uppercase represents a significant difference (p≤0.05).

<sup>a-c</sup> – Same column followed by different lowercase represents a significant difference (p≤0.05).

± standard deviation

Table S2. Protein and fat content and the population of lactic acid bacteria in yogurt is used in the production of smoothies.

| Parameters                                                            | Yogurt    |
|-----------------------------------------------------------------------|-----------|
| Protein content [%]                                                   | 3.26±0.21 |
| Fat content [%]                                                       | 3.2±0.17  |
| <i>L. delbrueckii</i> subsp. <i>bulgaricus</i> population [log CFU/g] | 6.1±0.1   |
| <i>S. thermophilus</i> population [log CFU/g]                         | 8.3±0.1   |

± standard deviation

Figure S1 HPLC chromatogram of anthocyanins in strawberry purified extracts in different pH (3.0, 3.5, and 4.5) after 4 weeks of cold storage.

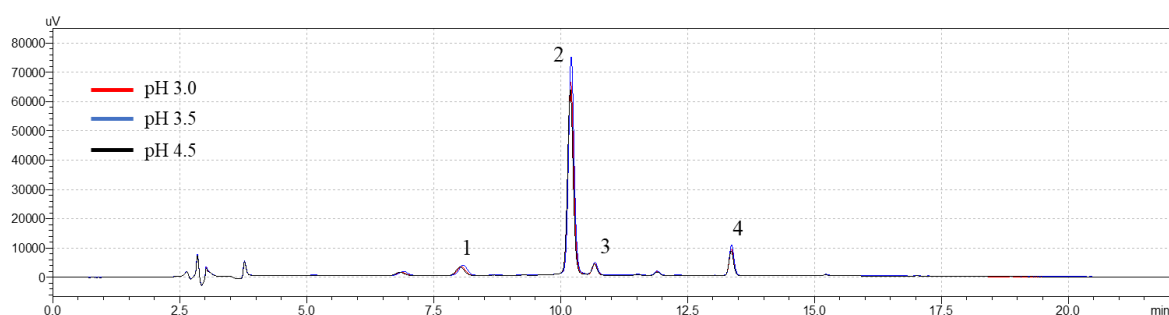

1. Cyanidin-3-O-glucoside, 2. Pelargonidin-3-O-glucoside, 3. Pelargonidin-3-O-rutinoside, 4. Pelargonidin 3-malonyl-glucoside.

Figure S2 HPLC chromatogram of anthocyanins in raspberry purified extracts in different cell-free extracts presence after 4 weeks of cold storage.

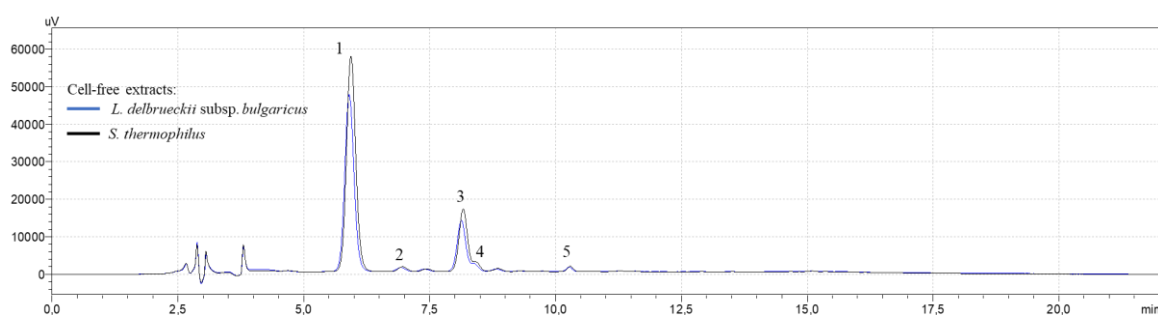

1. Cyanidin-3-O-sophoroside, 2. Cyanidin-3-O-glucosylrutinoside, 3. Cyanidin-3-O-glucoside, 4. Cyanidin-3-O-rutinoside, 5. Pelargonidin-3-O-glucosylrutinoside.

Figure S3 HPLC chromatogram of anthocyanins in blueberry purified extracts with the addition of various doses of hydrogen peroxidase (0; 3.0 and 6.0 µg/mL) after 4 weeks of cold storage.

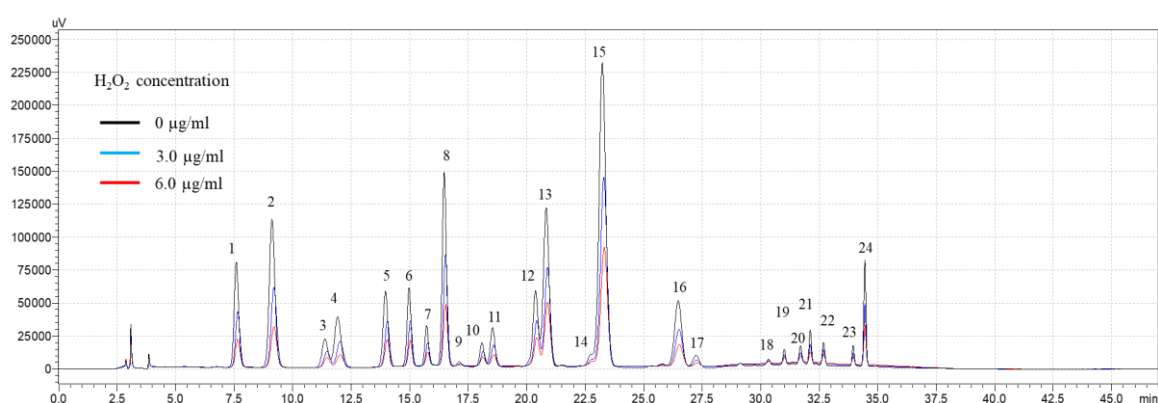

1. Delphinidin-3-O-galactoside, 2. Delphinidin-3-O-glucoside, 3. Cyanidin-3-O-galactoside, 4. Delphinidin-3-O-arabinoside, 5. Cyanidin-3-O-glucoside, 6. Petunidin-3-O-galactoside, 7. Cyanidin-3-O-arabinose, 8. Petunidin-3-O-glucoside, 9. Peonidin-3-O-galactoside, 10. Peonidin-3-O-glucoside, 11. Petunidin-3-O-arabinoside, 13. Malvidin-3-O-galactoside, 15. Malvidin-3-O-glucoside, 16. Malvidin-3-O-arabinoside, 12, 14, 16-24 – acylated anthocyanins.
